# Supplementary material for: Functional changes of the liver in the absence of growth hormone (GH) action – Proteomic and metabolomic insights from a GH receptor deficient pig model
Source: PubMed Central journal article supplement (PMC7184181; doi:10.1016/j.molmet.2020.100978), 2020-03-18
Supplement: mmc2.pdf [file mmc2.pdf]

**Supplementary Table 2: Addition to Supplementary Figures 1 and 2. List of metabolites measured with the AbsoluteIDQ® p180 Kit GAC.**

| <b>Acylcarnitines (40)</b>         |                                                     |             |                                 |
|------------------------------------|-----------------------------------------------------|-------------|---------------------------------|
| C0                                 | Carnitine                                           | C10:1       | Decenoylcarnitine               |
| C2                                 | Acetylcarnitine                                     | C10:2       | Decadienylcarnitine             |
| C3                                 | Propionylcarnitine                                  | C12         | Dodecanoylcarnitine             |
| C3:1                               | Propenoylcarnitine                                  | C12:1       | Dodecenoylcarnitine             |
| C3-OH                              | Hydroxypropionylcarnitine                           | C12-DC      | Dodecanedioylcarnitine          |
| C4                                 | Butyrylcarnitine                                    | C14         | Tetradecanoylcarnitine          |
| C4:1                               | Butenoylcarnitine                                   | C14:1       | Tetradecenoylcarnitine          |
| C4-OH (C3-DC)                      | Hydroxybutyrylcarnitine                             | C14:1-OH    | Hydroxytetradecenoylcarnitine   |
| C5                                 | Valerylcarnitine                                    | C14:2       | Tetradecadienylcarnitine        |
| C5:1                               | Tiglylcarnitine                                     | C14:2-OH    | Hydroxytetradecadienylcarnitine |
| C5:1-DC                            | Glutaconylcarnitine                                 | C16         | Hexadecanoylcarnitine           |
| C5-DC (C6-OH)                      | Glutaryl carnitine<br>(Hydroxyhexanoylcarnitine)    | C16:1       | Hexadecenoylcarnitine           |
| C5-M-DC                            | Methylglutaryl carnitine                            | C16:1-OH    | Hydroxyhexadecenoylcarnitine    |
| C5-OH (C3-DC-M)                    | Hydroxyvalerylcarnitine<br>(Methylmalonylcarnitine) | C16:2       | Hexadecadienylcarnitine         |
| C6 (C4:1-DC)                       | Hexanoylcarnitine<br>(Fumaryl carnitine)            | C16:2-OH    | Hydroxyhexadecadienylcarnitine  |
| C6:1                               | Hexenoylcarnitine                                   | C16-OH      | Hydroxyhexadecanoylcarnitine    |
| C7-DC                              | Pimelylcarnitine                                    | C18         | Octadecanoylcarnitine           |
| C8                                 | Octanoylcarnitine                                   | C18:1       | Octadecenoylcarnitine           |
| C9                                 | Nonanoylcarnitine                                   | C18:1-OH    | Hydroxyoctadecenoylcarnitine    |
| C10                                | Decanoylcarnitine                                   | C18:2       | Octadecadienylcarnitine         |
| <b>Amino Acids (21)</b>            |                                                     |             |                                 |
| Ala                                | Alanine                                             | Lys         | Lysine                          |
| Arg                                | Arginine                                            | Met         | Methionine                      |
| Asn                                | Asparagine                                          | Orn         | Ornithine                       |
| Asp                                | Aspartate                                           | Phe         | Phenylalanine                   |
| Cit                                | Citrulline                                          | Pro         | Proline                         |
| Gln                                | Glutamine                                           | Ser         | Serine                          |
| Glu                                | Glutamate                                           | Thr         | Threonine                       |
| Gly                                | Glycine                                             | Trp         | Tryptophan                      |
| His                                | Histidine                                           | Tyr         | Tyrosine                        |
| Ile                                | Isoleucine                                          | Val         | Valine                          |
| Leu                                | Leucine                                             |             |                                 |
| <b>Monosaccharides (1)</b>         |                                                     |             |                                 |
| Sum of Hexoses (including Glucose) |                                                     |             |                                 |
| <b>Glycerophospholipids (90)</b>   |                                                     |             |                                 |
| lysoPC a C14:0                     | PC aa C34:1                                         | PC aa C42:0 | PC ae C38:2                     |
| lysoPC a C16:0                     | PC aa C34:2                                         | PC aa C42:1 | PC ae C38:3                     |

|                             |                             |                      |                                |
|-----------------------------|-----------------------------|----------------------|--------------------------------|
| lysoPC a C16:1              | PC aa C34:3                 | PC aa C42:2          | PC ae C38:4                    |
| lysoPC a C17:0              | PC aa C34:4                 | PC aa C42:4          | PC ae C38:5                    |
| lysoPC a C18:0              | PC aa C36:0                 | PC aa C42:5          | PC ae C38:6                    |
| lysoPC a C18:1              | PC aa C36:1                 | PC aa C42:6          | PC ae C40:1                    |
| lysoPC a C18:2              | PC aa C36:2                 | PC ae C30:0          | PC ae C40:2                    |
| lysoPC a C20:3              | PC aa C36:3                 | PC ae C30:1          | PC ae C40:3                    |
| lysoPC a C20:4              | PC aa C36:4                 | PC ae C30:2          | PC ae C40:4                    |
| lysoPC a C24:0              | PC aa C36:5                 | PC ae C32:1          | PC ae C40:5                    |
| lysoPC a C26:0              | PC aa C36:6                 | PC ae C32:2          | PC ae C40:6                    |
| lysoPC a C26:1              | PC aa C38:0                 | PC ae C34:0          | PC ae C42:0                    |
| lysoPC a C28:0              | PC aa C38:1                 | PC ae C34:1          | PC ae C42:1                    |
| lysoPC a C28:1              | PC aa C38:3                 | PC ae C34:2          | PC ae C42:2                    |
| PC aa C24:0                 | PC aa C38:4                 | PC ae C34:3          | PC ae C42:3                    |
| PC aa C26:0                 | PC aa C38:5                 | PC ae C36:0          | PC ae C42:4                    |
| PC aa C28:1                 | PC aa C38:6                 | PC ae C36:1          | PC ae C42:5                    |
| PC aa C30:0                 | PC aa C40:1                 | PC ae C36:2          | PC ae C44:3                    |
| PC aa C30:2                 | PC aa C40:2                 | PC ae C36:3          | PC ae C44:4                    |
| PC aa C32:0                 | PC aa C40:3                 | PC ae C36:4          | PC ae C44:5                    |
| PC aa C32:1                 | PC aa C40:4                 | PC ae C36:5          | PC ae C44:6                    |
| PC aa C32:2                 | PC aa C40:5                 | PC ae C38:0          |                                |
| PC aa C32:3                 | PC aa C40:6                 | PC ae C38:1          |                                |
| <b>Sphingolipids (15)</b>   |                             |                      |                                |
| SM (OH) C14:1               | SM C18:0                    | SM (OH) C22:1        | SM (OH) C24:1                  |
| SM C16:0                    | SM C18:1                    | SM (OH) C22:2        | SM C26:0                       |
| SM C16:1                    | SM C20:2                    | SM C24:0             | SM C26:1                       |
| SM (OH) C16:1               | SM C22:3                    | SM C24:1             |                                |
| <b>Biogenic Amines (21)</b> |                             |                      |                                |
| Ac-Orn                      | Acetylornithine             | PEA                  | Phenylethylamine               |
| ADMA                        | Asymmetric dimethylarginine | <i>cis</i> -OH-Pro   | <i>cis</i> -4-Hydroxyproline   |
| alpha-AAA                   | alpha-Aminoadipic acid      | <i>trans</i> -OH-Pro | <i>trans</i> -4-Hydroxyproline |
| Carnosine                   | Carnosine                   | Putrescine           | Putrescine                     |
| Creatinine                  | Creatinine                  | SDMA                 | Symmetric dimethylarginine     |
| DOPA                        | DOPA                        | Serotonin            | Serotonin                      |
| Dopamine                    | Dopamine                    | Spermidine           | Spermidine                     |
| Histamine                   | Histamine                   | Spermine             | Spermine                       |
| Kynurenine                  | Kynurenine                  | Taurine              | Taurine                        |
| Met-SO                      | Methionine sulfoxide        | total DMA            | Total dimethylarginine         |
| Nitro-Tyr                   | Nitrotyrosine               |                      |                                |
