# Supplementary material for: Functional changes of the liver in the absence of growth hormone (GH) action – Proteomic and metabolomic insights from a GH receptor deficient pig model
Source: PubMed Central journal article supplement (PMC7184181; doi:10.1016/j.molmet.2020.100978), 2020-03-18
Supplement: mmc7.pdf [file mmc7.pdf]

### GO - Molecular Function

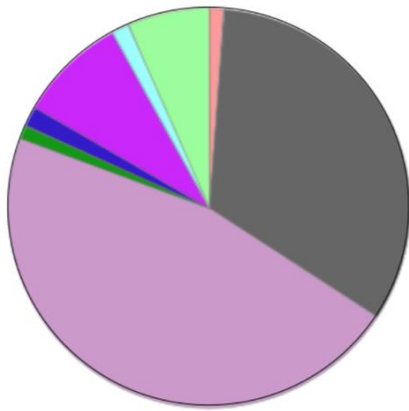

- Antioxidant activity (GO: 0016209)
- Binding (GO: 0005488)
- Catalytic activity (GO: 0003824)
- Receptor activity (GO: 0004872)
- Signal transducer activity (GO: 0004871)
- Structural molecule activity (GO: 0005198)
- Translation regulator activity (GO: 0045182)
- Transporter activity (GO: 0005215)

### GO - Cellular Component

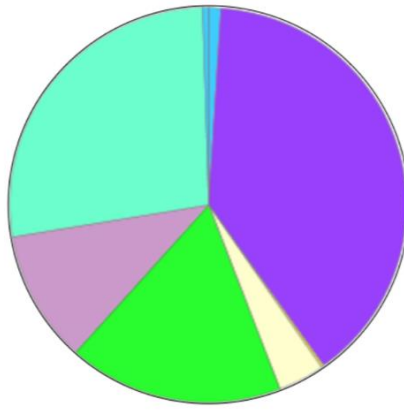

- Cell junction (GO: 0030054)
- Cell part (GO: 0044464)
- Extracellular matrix (GO: 0031012)
- Extracellular region (GO: 0005576)
- Macromolecular complex (GO: 0032991)
- Membrane (GO: 0016020)
- Organelle (GO: 0043226)
- Synapse (GO: 0045202)

### GO - Biological Process

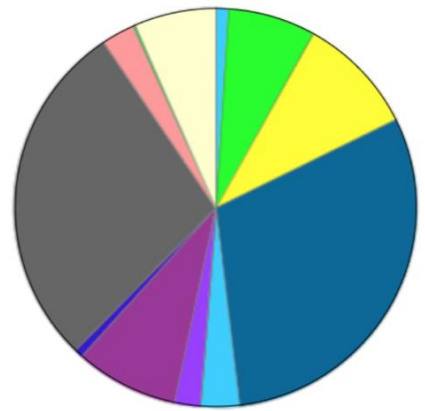

- Biological adhesion (GO: 0022610)
- Biological regulation (GO: 0065007)
- Cellular component organization or biogenesis (GO: 0071840)
- Cellular process (GO: 0009987)
- Developmental process (GO: 0032502)
- Growth (GO: 0040007)
- Immune system process (GO: 0002376)
- Localisation (GO: 0051179)
- Locomotion (GO: 0040011)
- Metabolic process (GO: 0008152)
- Multicellular organismal process (GO: 0032501)
- Reproduction (GO: 0000003)
- Response to stimulus (GO: 0050896)

**Supplementary Figure 2:** GO-Analysis of the 3232 detected protein families (see also Supplementary Table 1A) measured with QExacte (Thermo Scientific) using PANTHER ([pantherdb.org](http://pantherdb.org)).

### A: Amino Acids

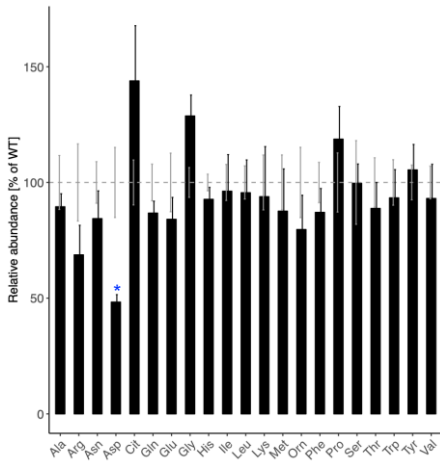

### B: Metabolic Indicators

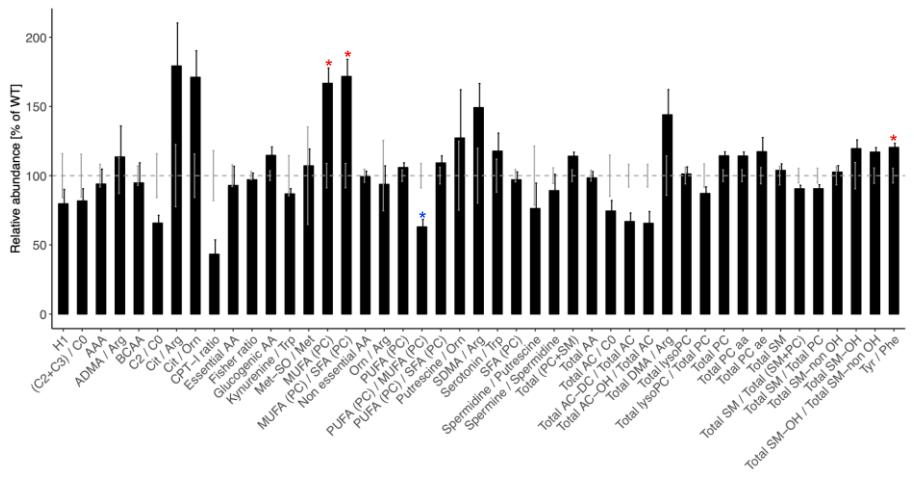

### C: Lipids

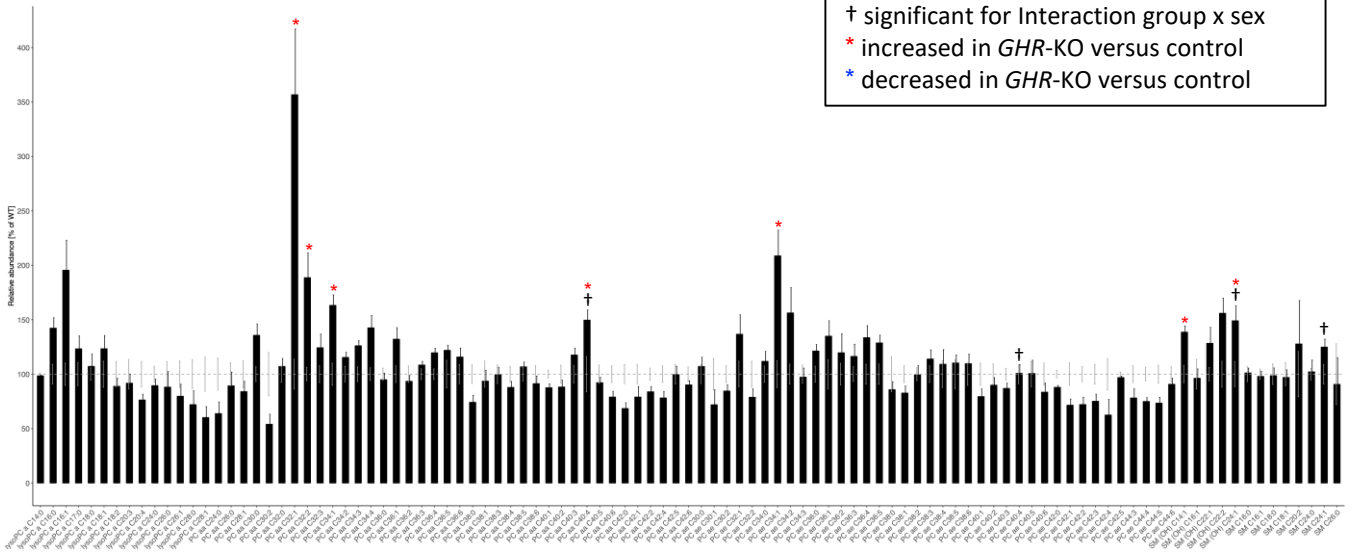

† significant for Interaction group x sex  
 \* increased in *GHR-KO* versus control  
 \* decreased in *GHR-KO* versus control

### D: Acylcarnitines

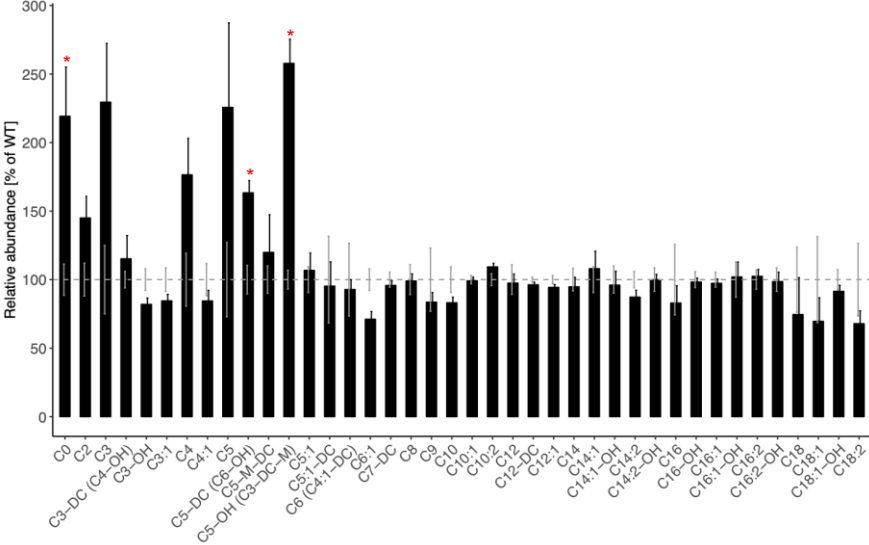

### E: Biogenic Amines

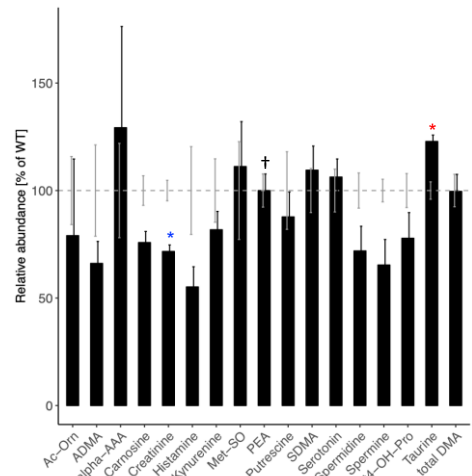

**Supplementary Figure 3:** Relative abundance changes of metabolites in *GHR-KO* vs. control liver tissue. Graphs show the relative abundances of amino acids (A), metabolic indicators (B), lipids (C), acylcarnitines (D), and biogenic amines (E) determined by targeted metabolomics. The dashed line indicates the mean abundance of the control samples, bars show the mean relative abundance in *GHR-KO* samples. Error bars represent the standard error of the mean (SEM).
